# Supplementary material
Source: Springer Nature journal article supplement (https://www.springermedizin.de/resource/supplementary/12888_2010_766_MOESM2_ESM.pdf/9478670)
Supplement: MOESM2 [file 9478670]

**All Patients in Data Set**  
N=1494  
Responders: 43%  
Non-responders: 57%

Improvement of at least 2 points on two of five positive items at Week 2?

No

Yes

n = 1049  
Responders: 28%  
Non-responders: 72%

**Likely Responder**  
n = 445  
Responders: 79%  
Non-responders: 21%

Improvement of at least 2 points on the excitement item at Week 2?

No

Yes

**Likely Non-responder**  
n = 929  
Responders: 25%  
Non-responders: 75%

**Not Predictable**  
n = 120  
Responders: 53 %  
Non-responders: 47%

**Predictive Characteristics**  
PPV: 79%  
NPV: 75%  
Not predictable: 8%  
Misclassified: 24%
